# Supplementary material
Source: PubMed Central journal article supplement (PMC2817321)
Supplement: 090979_1.pdf [file 090979_1.pdf]

**Appendix 1 (as submitted by author).** Codes used to identify prenatal ultrasound use, maternal co-morbidities and other variables

|                                                                            | Inpatient Discharge Abstract Database (DAD) |                                 | Outpatient Ontario Health Insurance Plan Database                                          |
|----------------------------------------------------------------------------|---------------------------------------------|---------------------------------|--------------------------------------------------------------------------------------------|
|                                                                            | ICD-9 code(s)                               | ICD-10 code(s)                  | Fee code or diagnostic code(s)                                                             |
| <b>Prenatal ultrasound</b>                                                 |                                             |                                 |                                                                                            |
| Gestational age for Maternal Serum Screening Program < 16 weeks' gestation | --                                          | --                              | <ul style="list-style-type: none"> <li>J157 (fee code)</li> <li>J457 (fee code)</li> </ul> |
| Limited for high risk pregnancy or complications of pregnancy              | --                                          | --                              | <ul style="list-style-type: none"> <li>J158 (fee code)</li> <li>J458 (fee code)</li> </ul> |
| Complete ≥ 16 weeks Gestation                                              | --                                          | --                              | <ul style="list-style-type: none"> <li>J159 (fee code)</li> <li>J459 (fee code)</li> </ul> |
| Complete for high risk pregnancy or complications of pregnancy             | --                                          | --                              | <ul style="list-style-type: none"> <li>J160 (fee code)</li> <li>J460 (fee code)</li> </ul> |
| <b>Maternal comorbidities</b>                                              |                                             |                                 |                                                                                            |
| Any diabetes mellitus                                                      | 250, 648.0, 648.8                           | E10, E11, E13, E14, O24         | 250                                                                                        |
| Any hypertension                                                           | 401, 405, 642.3-642.9                       | O10, I10, I15, O13-16           | 401, 642                                                                                   |
| Thyroid disease                                                            | 240-246, 648.1                              | E01-E07, E350, E890, O905, O992 | 193, 226, 240-245                                                                          |
| Cardiac disease                                                            | 390-398, 410-414, 420-425, 428              | I01-I08, I20-I25, I30-I43, I50  | 391, 394, 398, 410, 412, 413, 428, 429                                                     |
| Rheumatologic disease                                                      | 446, 695.4, 710                             | L93, M30-M34                    | 446, 447, 695, 710                                                                         |
| Venous thromboembolism                                                     | 451-453, 415.1                              | I80-I82, I26                    | 451, 415                                                                                   |
| Renal disease                                                              | 580-587                                     | N00-N08, N17-N19                | 580, 581, 584, 585                                                                         |
| Epilepsy                                                                   | 345                                         | G40-G41                         | 345                                                                                        |
| Supervision of high risk pregnancy                                         | V23.X                                       | Z35                             | --                                                                                         |
| <b>Other variables</b>                                                     |                                             |                                 |                                                                                            |
| Genetics consultation                                                      | --                                          | --                              | A221, A225, A226, A325, C225, C325, C226, C325, K004, K016, K222, K223, (fee codes)        |

|               | Inpatient Discharge Abstract Database (DAD) |                | Outpatient Ontario Health Insurance Plan Database |
|---------------|---------------------------------------------|----------------|---------------------------------------------------|
|               | ICD-9 code(s)                               | ICD-10 code(s) | Fee code or diagnostic code(s)                    |
| Amniocentesis | --                                          | --             | Z778 (fee code)                                   |
| Stillbirth    | 656.4                                       | O36.4          | --                                                |

Abbreviations: DAD, Canadian Institute for Health Information Discharge Abstract Database; ICD-9, International Classification of Diseases, 9<sup>th</sup> revision; ICD-10, International Classification of Diseases, 10<sup>th</sup> revision.
